# Supplementary material
Source: Research Square preprint supplement (doi:10.21203/rs.3.rs-9661922/v1)
Supplement: Supplementary file 1 [file 4660767e66c0a82b8a94cc73.docx]

| Characteristic | HFpEF or HFmrEF (n=89) | HFrEF (n=44) | P value |
| --- | --- | --- | --- |
| Age (y) | 65.9 ± 11 | 67.2 ± 8.7 | 0.493 |
| Gender (%Female) | 37 (41.6%) | 19 (43.2%) | 0.860 |
| Body mass index (kg/m2) | 30.4 ± 6.7 | 28.3 ± 4.8 | 0.518 |
| Systolic BP (mmHg) | 135.0 ± 16.2 | 128.0 ± 17.6 | 0.050 |
| Diastolic BP (mmHg) | 79.3 ± 10.3 | 76.7 ± 11.2 | 0.349 |
| Smoking   - Not used / ex user (%) - Active smoker (%) | 65 (82.3%)  14 (17.7%) | 30 (76.9%)  9 (23.1%) | 0.490 |
| Physical activity   - None / Infrequent (%) - Regular (%) | 58 (89.2%)  7 (10.8%) | 37 (97.4%)  1 (2.6%) | 0.253 |
| Hypertension (%) | 84 (94.4%) | 44 (100.0%) | 0.170 |
| Previous CVA (%) | 11 (12.5%) | 7 (16.3%) | 0.594 |
| Coronary artery disease (%) | 72 (81.8%) | 36 (83.7%) | 0.788 |
| Previous revascularization (%) | 59 (67.0%) | 28 (65.1%) | 0.826 |
| Peripheral artery disease (%) | 13 (15.5%) | 7 (16.3%) | 0.906 |
| Estimated GFR (ml/min/1.73 m2) | 49.4 ± 18.4 | 45.1 ± 16.3 | 0.140 |
| N-terminal pro-BNP (pg/ml) | 919.0 [201.0 - 1998.0] | 1172.0 [891.0 - 4744.0] | 0.645 |
| Hemoglobin (g/dl) | 13.1 ± 2.1 | 12.6 ± 2.1 | 0.169 |
| Sodium (mEq/L) | 139.0 ± 2.9 | 138.0 ± 4.3 | 0.626 |
| Potassium (mEq/L) | 4.4 ± 0.5 | 4.4 ± 0.5 | 0.585 |
| Hemoglobin A1c (%) | 8.2 [6.8 - 9.3] | 7.2 [6.8 - 8.2] | 0.175 |
| Albuminuria (mg/d) | 435.0 [177.0 - 1683.0] | 520 [211 - 928] | 0.959 |

Supplementary Table 1. Baseline demographic and clinical characteristics of patients with and without heart failure. HF: Heart failure, BP: Blood pressure, CVA: Cerebrovascular accident, GFR: Glomerular filtration rate.

| Characteristic | HFpEF or HFmrEF (n=89) | HFrEF (n=44) | P value |
| --- | --- | --- | --- |
| Medications   - ACE inhibitors (%) - ARBs (%) - Calcium CBs (%) - Beta blockers (%) - Furosemide (%) - SGLT2 inhibitors (%) - GLP1 agonists (%) | 33 (37.1%  45 (48.6%)  41 (46.1%)  68 (76.4%)  34 (38.6%)  80 (89.9%)  5 (5.6%) | 20 (45.5%)  20 (45.5%)  14 (32.6%)  36 (85.7%)  32 (74.4%)  37 (84.1%)  0 (0.0%) | 0.353  0.663  0.140  0.219  <0.001  0.334  0.173 |
| RAS inhibitor dose   - Submaximal (%) - Maximal (%) | 19 (24.7%)  58 (75.3%) | 19 (48.7%)  20 (51.3%) | 0.009 |
| RAS inhibitor duration (mo) | 120.0 [72.0 - 180.0] | 98.0 [55.0 - 180.0] | 0.420 |
| SGLT2 inhibitor duration (mo) | 20.0 [6.0 - 36.0] | 12.0 [10.0 - 20.0] | 0.201 |
| Finerenone starting dose   - 10 mg - 20 mg | 85 (91.0%)  8 (9.0%) | 40 (90.9%)  4 (9.1%) | 0.985 |

Supplementary Table 2. Baseline medical therapy of patients with and without heart failure. HF: Heart failıre, RAS: Renin-angiotensin system, SGLT2: Sodium-glucose linked transporter.

| **Characteristic** | **At baseline** | **3-months follow up** | **Pchange** | **ES** | **Pint** |
| --- | --- | --- | --- | --- | --- |
| **Serum potassium (mEq/L)** | | | | | |
| HFpEF / HFmrEF (n=53) | 4.42 ± 0.45 | 4.75 ± 0.46 | <0.001 | -0.633 | 0.733 |
| HFrEF (n=25) | 4.35 ± 0.42 | 4.69 ± 0.45 | <0.001 | -0.762 |  |
| **Estimated glomerular filtration rate (ml/min/1.73 m2)** | | | | | |
| HFpEF / HFmrEF (n=47) | 50.1 ± 14.1 | 48.7 ± 14.2 | 0.285 | 0.158 | 0.299 |
| HFrEF (n=22) | 48.1 ± 18.6 | 44.6 ± 18.6 | 0.178 | 0.326 |  |
| **Albuminuria (mg/d)** | | | | | |
| HFpEF / HFmrEF (n=28) | 555.0 [330 - 1758] | 512.0 [160.0 - 1048.0] | <0.001 | 0.764 | 0.200 |
| HFrEF (n=14) | 540.0 [457.0 - 899.0] | 437.0 [133.0 - 595.0] | 0.004 | 0.829 |  |

Supplementary Table 3. Changes in serum potassium, estimated glomerular filtration rate and albuminuria at 3rd month in patients with and without HF. ES: Pchange: P value for change in paired variables, Effect size, Pint: P value for interaction, HF: Heart failure.
